# Supplementary material
Source: PubMed Central journal article supplement (PMC7918179)
Supplement: bloodBLD2020006052-suppl1.pdf [file bloodBLD2020006052-suppl1.pdf]

**Supplemental Figure 1.** Parameters from TITAN and HERCULES utilized in cost effectiveness modeling including day of therapeutic plasma exchange, length of stay and percentage of patients who received rituximab. Abbreviations: TPE, therapeutic plasma exchange; LOS, length of stay; ICU, intensive care unit; SOC, standard of care arm. \*LOS parameter from HERCULES was used to fill in missing LOS data in TITAN.

| Parameter                                  | TITAN               |              | HERCULES            |               |
|--------------------------------------------|---------------------|--------------|---------------------|---------------|
|                                            | <i>Caplacizumab</i> | SOC          | <i>Caplacizumab</i> | SOC           |
| TPE, days                                  | 7.7                 | 11.7         | 5.8                 | 9.4           |
| LOS, days (ICU/total)*                     | 3.4/9.9*            | 9.7/14.4*    | 3.4/9.9             | 9.7/14.4      |
| Rituximab, number of patients (percentage) | 2/36 (5.6%)         | 9/39 (23.1%) | 28/72 (38.9%)       | 35/73 (47.9%) |
